# Supplementary material for: The Association of Food Groups and Consumption Time with Hyperuricemia: The U.S. National Health and Nutrition Examination Survey, 2005–2018
Source: MDPI journal article supplement (doi:10.3390/nu15143109), 2023-07-12
Supplement: s1 [file s1]

**Supplementary Table S1. Food Patterns Equivalents Database Components**

| FPED<br>component<br>variable name | Foods                                                                                            |
|------------------------------------|--------------------------------------------------------------------------------------------------|
| f_whole                            | Whole fruit                                                                                      |
| f_citmlb                           | Intact fruits (whole or cut) of citrus, melons, and berries                                      |
| f_juice                            | Fruit juices, citrus and non-citrus                                                              |
| f_other                            | Intact fruits (whole or cut); excluding citrus, melons, and berries                              |
| f_total                            | Total intact fruits (whole or cut) and fruit juices                                              |
| v_drkgr                            | Dark green vegetables                                                                            |
| v_redor_tomato                     | Tomatoes and tomato products                                                                     |
| v_redor_other                      | Other red and orange vegetables, excluding tomatoes and tomato products                          |
| v_redor_total                      | Total red and orange vegetables (tomatoes and tomato products + other red and orange vegetables) |
| v_starchy_potat<br>o               | White potatoes                                                                                   |
| v_starchy_other                    | Other starchy vegetables, excluding white potatoes                                               |
| v_starchy_total                    | Total starchy vegetables (white potatoes + other starchy vegetables)                             |
| v_other                            | Other vegetables not in the vegetable components listed above                                    |
| v_total                            | Total dark green, red and orange, starchy, and other vegetables;                                 |

---

|              |                                                                                                                                                                                                                                                        |
|--------------|--------------------------------------------------------------------------------------------------------------------------------------------------------------------------------------------------------------------------------------------------------|
|              | excludes legumes                                                                                                                                                                                                                                       |
| v_legumes    | Beans and peas (legumes) computed as vegetables                                                                                                                                                                                                        |
| g_whole      | Grains defined as whole grains and contain the entire grain kernel — the bran, germ, and endosperm                                                                                                                                                     |
| g_refined    | Refined grains that do not contain all of the components of the entire grain kernel                                                                                                                                                                    |
| g_total      | Total whole and refined grains                                                                                                                                                                                                                         |
| d_milk       | Fluid milk, buttermilk, evaporated milk, dry milk, and calcium fortified soy milk                                                                                                                                                                      |
| d_yogurt     | Yogurt                                                                                                                                                                                                                                                 |
| d_cheese     | Cheeses                                                                                                                                                                                                                                                |
| d_total      | Total milk, yogurt, cheese, and whey. For some foods, the total dairy values could be higher than the sum of D_MILK, D_YOGURT, and D_CHEESE because the Miscellaneous Dairy component composed of whey is not included in FPED as a separate variable. |
| pf_meat      | Beef, veal, pork, lamb, and game meat; excludes organ meat and cured meat                                                                                                                                                                              |
| pf_curedmeat | Frankfurters, sausages, corned beef, cured ham and luncheon meat that are made from beef, pork, or poultry                                                                                                                                             |
| pf_organ     | Organ meat from beef, veal, pork, lamb, game, and poultry                                                                                                                                                                                              |
| pf_poult     | Chicken, turkey, Cornish hens, duck, goose, quail, and pheasant                                                                                                                                                                                        |

---

---

|              |                                                                                                                                                                                                                                                                                        |
|--------------|----------------------------------------------------------------------------------------------------------------------------------------------------------------------------------------------------------------------------------------------------------------------------------------|
|              | (game birds); excludes organ meat and cured meat                                                                                                                                                                                                                                       |
| pf_seafd_hi  | Seafood (finfish, shellfish, and other seafood) high in n-3 fatty acids                                                                                                                                                                                                                |
| pf_seafd_low | Seafood (finfish, shellfish, and other seafood) low in n-3 fatty acids                                                                                                                                                                                                                 |
| pf_mps_total | Total of meat, poultry, seafood, organ meat, and cured meat                                                                                                                                                                                                                            |
| pf_eggs      | Eggs (chicken, duck, goose, quail) and egg substitutes                                                                                                                                                                                                                                 |
| pf_soy       | Soy products, excluding calcium fortified soy milk (soymilk) and products made with raw (green) soybean                                                                                                                                                                                |
| pf_nutsds    | Peanuts, tree nuts, and seeds; excludes coconut                                                                                                                                                                                                                                        |
| pf_legumes   | Beans and peas (legumes) computed as protein foods                                                                                                                                                                                                                                     |
| pf_total     | Total meat, poultry, organ meat, cured meat, seafood, eggs, soy, and nuts and seeds; excludes legumes                                                                                                                                                                                  |
| add_sugars   | Caloric sweeteners such as syrups and sugars and others defined as added sugars                                                                                                                                                                                                        |
| oils         | Fats naturally present in nuts, seeds, and seafood; all unhydrogentated vegetable oils, except palm oil, palm kernel oil, and coconut oils; the fat present in avocado and olives above the allowable amount; 50% of the fat present in stick and tub margarines and margarine spreads |
| solid_fats   | Fats naturally present in meat, poultry, eggs, and dairy (lard, tallow, and butter); fully or partially hydrogenated oils;                                                                                                                                                             |

---

---

|          |                                                                                                                                                                                            |
|----------|--------------------------------------------------------------------------------------------------------------------------------------------------------------------------------------------|
|          | shortening; palm oil; palm kernel oil; coconut oils; fats naturally present in coconut meat and cocoa butter; and 50% of the fat present in stick and tub margarines and margarine spreads |
| a_drinks | Alcoholic beverages and alcohol (ethanol) added to foods after cooking                                                                                                                     |

---

FPED, Food Patterns Equivalents Database

**Supplementary Table S2.** Characteristics of participants with/without the HUA in the breakfast cohort

| Characteristics                   | Total        | Non-HUA      | HUA         | <i>P</i> -value |
|-----------------------------------|--------------|--------------|-------------|-----------------|
|                                   | N=29920      | n=24962      | n=4958      |                 |
| Age (years)                       | 45.37±21.33  | 44.21±21.12  | 51.1±19.99  | < 0.001         |
| Male, %                           | 14507(48.49) | 11796(45.88) | 2711(55.21) | <0.001          |
| Non-Hispanic white, %             | 14117(47.78) | 11640(47.45) | 2477(50.21) | <0.001          |
| College graduate or above, %      | 6601(22.06)  | 5554(22.74)  | 1047(21.70) | <0.001          |
| Household income over \$75,000, % | 8205(27.42)  | 6969(36.80)  | 1236(23.26) | <0.001          |
| Exercised regularly, %            | 11920(27.91) | 10320(29.70) | 1600(21.95) | <0.001          |
| Married, %                        | 8214(44.45)  | 7131(42.60)  | 1083(48.72) | <0.001          |
| Smoking, %                        | 6817(16.53)  | 5739(18.43)  | 1078(14.01) | <0.001          |
| Drinking, %                       | 4709(55.74)  | 3992(53.16)  | 717(58.22)  | <0.001          |
| BMI, kg/m <sup>2</sup>            | 28.33±7.08   | 27.54±6.64   | 32.29±7.73  | <0.001          |
| DM, %                             | 6749(22.56)  | 4869(17.35)  | 1880(32.29) | <0.001          |
| Pre-DM, %                         | 8014(26.78)  | 6247(24.42)  | 1767(34.91) | <0.001          |
| Hypertension, %                   | 10958(36.62) | 7930(31.11)  | 3028(57.12) | <0.001          |
| Hyperlipidemia, %                 | 19470(65.07) | 15445(62.10) | 4025(81.57) | <0.001          |
| CKD, %                            | 5321(17.78)  | 3663(11.92)  | 1658(27.79) | <0.001          |

Continuous variables are presented as mean±standard deviation. Categorical variables

are presented as numbers (% , percentage). BMI, body mass index. DM, diabetes mellitus, Pre-DM, prediabetes, CKD, Chronic Kidney Disease, HUA, hyperuricemia.

**Supplementary Table S3.** Characteristics of participants with/without the HUA in the lunch cohort

| Characteristics                   | Total        | Non-HUA      | HUA         | <i>P</i> - |
|-----------------------------------|--------------|--------------|-------------|------------|
|                                   | N=27927      | n=23435      | n=4492      | value      |
| Age (years)                       | 43.29±21.06  | 42.27±20.73  | 48.52±20.80 | < 0.001    |
| Male, %                           | 13549(48.52) | 11027(46.11) | 2522(57.04) | <0.001     |
| Non-Hispanic white, %             | 12779(45.76) | 10564(44.89) | 2215(49.33) | <0.001     |
| College graduate or above, %      | 6153(22.03)  | 5194(20.99)  | 959(25.33)  | <0.001     |
| Household income over \$75,000, % | 7853(28.12)  | 6685(37.30)  | 1168(24.39) | <0.001     |
| Exercised regularly, %            | 8010(28.68)  | 6957(30.24)  | 1053(21.26) | <0.001     |
| Married, %                        | 11643(41.69) | 9562(40.93)  | 2081(46.05) | <0.001     |
| Smoking, %                        | 4193(15.01)  | 3561(16.55)  | 632(13.59)  | <0.001     |
| Drinking, %                       | 14723(52.72) | 12150(52.34) | 2573(57.55) | <0.001     |
| BMI, kg/m <sup>2</sup>            | 28.25±7.16   | 27.47±6.74   | 32.22±7.80  | <0.001     |
| DM, %                             | 5747(20.58)  | 4195(16.27)  | 1552(29.60) | <0.001     |
| Pre-DM, %                         | 7185(25.73)  | 5626(23.49)  | 1559(33.33) | <0.001     |
| Hypertension, %                   | 9158(32.79)  | 6658(28.71)  | 2500(52.77) | <0.001     |
| Hyperlipidemia, %                 | 17502(62.67) | 13949(62.98) | 3553(80.53) | <0.001     |
| CKD, %                            | 4551(16.3)   | 3215(11.40)  | 1336(25.79) | <0.001     |

Continuous variables are presented as mean $\pm$ standard deviation. Categorical variables are presented as numbers (% , percentage). BMI, body mass index. DM, diabetes mellitus, Pre-DM, prediabetes, CKD, Chronic Kidney Disease, HUA, hyperuricemia.



**Supplementary Table S4.** Characteristics of participants with/without the HUA in the dinner cohort

| Characteristics                   | Total        | Non-HUA      | HUA         | <i>P</i> -value |
|-----------------------------------|--------------|--------------|-------------|-----------------|
|                                   | N=27447      | n=23082      | n=4365      |                 |
| Age (years)                       | 41.56±20.61  | 40.66±20.25  | 46.3±20.65  | < 0.001         |
| Male, %                           | 13380(48.75) | 10866(46.59) | 2514(59.10) | <0.001          |
| Non-Hispanic white, %             | 11324(41.26) | 9456(41.15)  | 1868(43.18) | <0.001          |
| College graduate or above, %      | 6067(22.1)   | 5123(22.29)  | 944(21.11)  | <0.001          |
| Household income over \$75,000, % | 7764(28.29)  | 6610(29.53)  | 1154(24.35) | <0.001          |
| Exercised regularly, %            | 8339(30.38)  | 7224(31.10)  | 1115(26.52) | <0.001          |
| Married, %                        | 10822(39.43) | 8893(36.24)  | 1929(44.80) | <0.001          |
| Smoking, %                        | 4313(15.71)  | 3623(16.34)  | 690(15.58)  | <0.001          |
| Drinking, %                       | 14751(53.74) | 12161(52.66) | 2590(59.25) | <0.001          |
| BMI, kg/m <sup>2</sup>            | 28.09±7.22   | 27.29±6.74   | 32.29±8.00  | <0.001          |
| DM, %                             | 5368(19.56)  | 3887(15.11)  | 1481(28.51) | <0.001          |
| Pre-DM, %                         | 6959(25.35)  | 5443(23.13)  | 1516(33.44) | <0.001          |
| Hypertension, %                   | 8517(31.03)  | 6165(26.68)  | 2352(50.57) | <0.001          |
| Hyperlipidemia, %                 | 16852(61.4)  | 13430(57.62) | 3422(79.39) | <0.001          |
| CKD, %                            | 4138(15.08)  | 2935(10.36)  | 1203(22.84) | <0.001          |

Continuous variables are presented as mean±standard deviation. Categorical variables

are presented as numbers (% , percentage). BMI, body mass index. DM, diabetes mellitus, Pre-DM, prediabetes, CKD, Chronic Kidney Disease, HUA, hyperuricemia.

**Supplementary Table S5.** ORs and 95%CI for the association of variety of diets with and HUA stratified by gender

| Characteristics  | Male (n = 20297)   | Female (n = 20933)  |
|------------------|--------------------|---------------------|
|                  | OR (95%CI)         | OR (95%CI)          |
| f_whole          | 0.960(0.913,1.009) | 0.926(0.857, 1.001) |
| f_citmlb         | 1.002(0.920,1.092) | 0.926(0.782, 1.097) |
| f_juice          | 0.939(0.872,1.011) | 0.803(0.694, 0.930) |
| f_other          | 0.930(0.868,0.995) | 0.920(0.849, 0.998) |
| f_total          | 0.955(0.915,0.996) | 0.897(0.837, 0.962) |
| v_drkgr          | 0.977(0.837,1.141) | 1.235(1.053, 1.448) |
| v_redor_tomato   | 0.949(0.835,1.078) | 0.931(0.764, 1.134) |
| v_redor_other    | 0.740(0.565,0.971) | 1.088(0.890, 1.329) |
| v_redor_total    | 0.902(0.800,1.017) | 0.985(0.848, 1.146) |
| v_starchy_potato | 1.054(0.969,1.147) | 0.896(0.779, 1.030) |
| v_starchy_other  | 0.919(0.774,1.092) | 1.203(0.924, 1.565) |
| v_starchy_total  | 1.035(0.959,1.117) | 0.943(0.839, 1.060) |
| v_other          | 0.945(0.862,1.035) | 1.002(0.923, 1.089) |
| v_total          | 0.976(0.928,1.027) | 1.015(0.967, 1.066) |
| v_legumes        | 0.916(0.788,1.064) | 0.934(0.715, 1.220) |
| g_whole          | 0.950(0.910,0.991) | 0.943(0.884, 1.007) |
| g_refined        | 0.960(0.947,0.972) | 0.962(0.942, 0.982) |
| g_total          | 0.957(0.944,0.969) | 0.957(0.937, 0.978) |

---

|              |                    |                     |
|--------------|--------------------|---------------------|
| d_milk       | 0.824(0.776,0.875) | 0.835(0.767, 0.909) |
| d_yogurt     | 0.731(0.501,1.067) | 0.736(0.519, 1.045) |
| d_cheese     | 0.909(0.860,0.960) | 0.921(0.850, 0.998) |
| d_total      | 0.868(0.828,0.909) | 0.866(0.818, 0.916) |
| pf_meat      | 0.984(0.967,1.002) | 0.991(0.954, 1.030) |
| pf_curedmeat | 0.961(0.933,0.990) | 0.951(0.903, 1.002) |
| pf_organ     | 0.981(0.873,1.103) | 1.061(0.890, 1.266) |
| pf_poult     | 1.041(1.026,1.057) | 1.062(1.034, 1.091) |
| pf_seafd_hi  | 1.038(0.993,1.085) | 1.121(1.051, 1.194) |
| pf_seafd_low | 1.012(0.990,1.034) | 0.983(0.942, 1.027) |
| pf_mps_total | 1.008(0.996,1.020) | 1.022(1.001, 1.043) |
| pf_eggs      | 0.907(0.857,0.960) | 0.845(0.771, 0.926) |
| pf_soy       | 0.873(0.750,1.015) | 1.051(0.872, 1.265) |
| pf_nutsds    | 0.980(0.951,1.010) | 0.955(0.907, 1.006) |
| pf_legumes   | 0.979(0.942,1.016) | 0.982(0.919, 1.050) |
| pf_total     | 0.999(0.988,1.011) | 1.002(0.985, 1.020) |
| add_sugars   | 0.997(0.993,1.000) | 0.996(0.990, 1.001) |
| oils         | 0.998(0.995,1.001) | 0.996(0.992, 0.999) |
| solid_fats   | 0.994(0.992,0.996) | 0.995(0.992, 0.998) |
| a_drinks     | 1.084(1.060,1.108) | 1.152(1.097, 1.211) |

---

Results were adjusted for age, race, marriage, education, smoking, drinking, income, exercise, BMI, DM, pre-DM, hyperlipidemia, hypertension and CKD. DM, diabetes

mellitus, Pre-DM, prediabetes, CKD, Chronic Kidney Disease, HUA, hyperuricemia.

**Supplementary Table S6.** ORs and 95%CI for the association of variety of diets with and HUA stratified by hypertension

| Characteristics  | Non-hypertension (n = 27101) | Hypertension (n = 14129) |
|------------------|------------------------------|--------------------------|
|                  | OR (95%CI)                   | OR (95%CI)               |
| f_whole          | 0.968(0.907,1.034)           | 0.934(0.877,0.994)       |
| f_citmlb         | 0.984(0.882,1.098)           | 0.964(0.866,1.072)       |
| f_juice          | 0.921(0.850,0.998)           | 0.889(0.806,0.981)       |
| f_other          | 0.955(0.885,1.031)           | 0.910(0.839,0.988)       |
| f_total          | 0.955(0.910,1.002)           | 0.924(0.874,0.977)       |
| v_drkgr          | 1.125(0.967,1.308)           | 1.044(0.918,1.187)       |
| v_redor_tomato   | 1.071(0.918,1.249)           | 0.863(0.762,0.978)       |
| v_redor_other    | 0.890(0.693,1.144)           | 0.861(0.646,1.146)       |
| v_redor_total    | 1.024(0.897,1.167)           | 0.863(0.766,0.973)       |
| v_starchy_potato | 0.979(0.895,1.071)           | 1.037(0.935,1.150)       |
| v_starchy_other  | 1.165(0.948,1.433)           | 0.832(0.633,1.093)       |
| v_starchy_total  | 1.024(0.897,1.167)           | 1.008(0.918,1.106)       |
| v_other          | 0.984(0.917,1.056)           | 0.965(0.866,1.076)       |
| v_total          | 1.012(0.969,1.056)           | 0.974(0.921,1.031)       |
| v_legumes        | 0.978(0.818,1.168)           | 0.903(0.747,1.090)       |
| g_whole          | 0.931(0.881,0.983)           | 0.962(0.925,1.001)       |
| g_refined        | 0.961(0.946,0.976)           | 0.968(0.952,0.984)       |

|              |                    |                    |
|--------------|--------------------|--------------------|
| g_total      | 0.956(0.941,0.971) | 0.965(0.949,0.981) |
| d_milk       | 0.812(0.764,0.864) | 0.843(0.774,0.918) |
| d_yogurt     | 0.765(0.527,1.110) | 0.754(0.547,1.039) |
| d_cheese     | 0.904(0.854,0.957) | 0.946(0.883,1.013) |
| d_total      | 0.854(0.816,0.894) | 0.893(0.841,0.948) |
| pf_meat      | 0.997(0.975,1.020) | 0.985(0.957,1.013) |
| pf_curedmeat | 0.942(0.907,0.979) | 0.977(0.947,1.009) |
| pf_organ     | 1.005(0.870,1.160) | 0.977(0.883,1.081) |
| pf_poult     | 1.049(1.030,1.069) | 1.049(1.026,1.073) |
| pf_seafd_hi  | 1.053(0.999,1.109) | 1.090(1.014,1.171) |
| pf_seafd_low | 1.026(0.999,1.054) | 0.981(0.952,1.010) |
| pf_mps_total | 1.020(1.007,1.033) | 1.009(0.993,1.024) |
| pf_eggs      | 0.883(0.825,0.945) | 0.903(0.847,0.963) |
| pf_soy       | 0.925(0.783,1.092) | 0.990(0.806,1.216) |
| pf_nutsds    | 0.983(0.950,1.019) | 0.963(0.928,0.999) |
| pf_legumes   | 0.994(0.951,1.039) | 0.975(0.930,1.022) |
| pf_total     | 1.008(0.995,1.022) | 0.997(0.983,1.010) |
| add_sugars   | 0.998(0.994,1.002) | 0.995(0.991,1.000) |
| oils         | 0.998(0.995,1.001) | 0.997(0.994,1.001) |
| solid_fats   | 0.994(0.992,0.997) | 0.996(0.993,0.998) |
| a_drinks     | 1.113(1.086,1.142) | 1.090(1.052,1.130) |

Results were adjusted for age, gender, race, marriage, education, smoking, drinking,

income, exercise, BMI, DM, pre-DM, hyperlipidemia and CKD. DM, diabetes mellitus, Pre-DM, prediabetes, CKD, Chronic Kidney Disease, HUA, hyperuricemia.



**Supplementary Table S7.** ORs and 95%CI for the association of variety of diets with and HUA stratified by CKD

| Characteristics  | Non-CKD (n = 34344) | CKD (n = 6886)     |
|------------------|---------------------|--------------------|
|                  | OR (95%CI)          | OR (95%CI)         |
| f_whole          | 0.943(0.895,0.995)  | 0.985(0.894,1.085) |
| f_citmlb         | 0.950(0.864,1.046)  | 1.055(0.906,1.227) |
| f_juice          | 0.901(0.830,0.979)  | 0.901(0.799,1.015) |
| f_other          | 0.934(0.878,0.993)  | 0.929(0.821,1.050) |
| f_total          | 0.933(0.892,0.976)  | 0.962(0.894,1.036) |
| v_drkgr          | 1.095(0.970,1.237)  | 1.121(0.930,1.351) |
| v_redor_tomato   | 0.976(0.854,1.114)  | 0.920(0.749,1.129) |
| v_redor_other    | 0.832(0.671,1.032)  | 1.164(0.857,1.583) |
| v_redor_total    | 0.942(0.840,1.057)  | 0.982(0.815,1.182) |
| v_starchy_potato | 1.017(0.938,1.102)  | 0.943(0.811,1.096) |
| v_starchy_other  | 0.998(0.825,1.207)  | 1.005(0.668,1.512) |
| v_starchy_total  | 1.014(0.943,1.090)  | 0.954(0.836,1.088) |
| v_other          | 0.980(0.916,1.048)  | 0.992(0.864,1.139) |
| v_total          | 0.998(0.958,1.041)  | 0.992(0.917,1.073) |
| v_legumes        | 0.956(0.833,1.098)  | 0.879(0.654,1.181) |
| g_whole          | 0.952(0.915,0.990)  | 0.924(0.870,0.982) |
| g_refined        | 0.961(0.949,0.973)  | 0.973(0.948,0.999) |
| g_total          | 0.958(0.946,0.970)  | 0.965(0.941,0.990) |

|              |                    |                    |
|--------------|--------------------|--------------------|
| d_milk       | 0.828(0.782,0.877) | 0.831(0.756,0.914) |
| d_yogurt     | 0.845(0.630,1.134) | 0.575(0.348,0.950) |
| d_cheese     | 0.898(0.850,0.949) | 1.063(0.965,1.171) |
| d_total      | 0.864(0.827,0.903) | 0.917(0.862,0.976) |
| pf_meat      | 0.987(0.968,1.006) | 1.002(0.967,1.037) |
| pf_curedmeat | 0.952(0.921,0.983) | 0.980(0.936,1.025) |
| pf_organ     | 0.989(0.893,1.097) | 0.970(0.775,1.214) |
| pf_poult     | 1.057(1.043,1.071) | 1.019(0.985,1.054) |
| pf_seafd_hi  | 1.062(1.014,1.113) | 1.116(1.030,1.209) |
| pf_seafd_low | 1.007(0.986,1.029) | 0.999(0.955,1.046) |
| pf_mps_total | 1.015(1.005,1.026) | 1.012(0.989,1.035) |
| pf_eggs      | 0.889(0.843,0.937) | 0.892(0.810,0.982) |
| pf_soy       | 0.967(0.855,1.093) | 0.870(0.690,1.096) |
| pf_nutsds    | 0.970(0.942,0.999) | 1.000(0.948,1.054) |
| pf_legumes   | 0.989(0.955,1.023) | 0.969(0.900,1.043) |
| pf_total     | 1.003(0.992,1.014) | 1.003(0.984,1.023) |
| add_sugars   | 0.997(0.994,1.000) | 0.995(0.989,1.002) |
| oils         | 0.998(0.995,1.000) | 0.997(0.993,1.002) |
| solid_fats   | 0.994(0.992,0.996) | 0.999(0.995,1.002) |
| a_drinks     | 1.101(1.075,1.127) | 1.086(1.031,1.145) |

Results were adjusted for age, gender, race, marriage, education, smoking, drinking, income, exercise, BMI, DM, pre-DM, hyperlipidemia and hypertension. DM, diabetes

mellitus, Pre-DM, prediabetes, CKD, Chronic Kidney Disease, HUA, hyperuricemia.

**Supplementary Table S8.** ORs and 95%CI for the association of variety of diets with and HUA stratified by drinking

| Characteristics  | Non-drinking (n = 19577) | Drinking (n = 21653) |
|------------------|--------------------------|----------------------|
|                  | OR (95%CI)               | OR (95%CI)           |
| f_whole          | 0.943(0.873,1.018)       | 0.960(0.902, 1.022)  |
| f_citmlb         | 0.982(0.869,1.110)       | 0.998(0.993, 1.003)  |
| f_juice          | 0.892(0.791,1.006)       | 0.912(0.839, 0.992)  |
| f_other          | 0.915(0.829,1.011)       | 0.943(0.872, 1.021)  |
| f_total          | 0.931(0.869,0.999)       | 0.947(0.899, 0.998)  |
| v_drkgr          | 1.174(0.947,1.455)       | 1.074(0.940, 1.227)  |
| v_redor_tomato   | 1.113(0.918,1.349)       | 0.932(0.811, 1.071)  |
| v_redor_other    | 0.655(0.432,0.994)       | 0.888(0.701, 1.125)  |
| v_redor_total    | 0.976(0.820,1.161)       | 0.922(0.815, 1.041)  |
| v_starchy_potato | 1.053(0.905,1.225)       | 0.998(0.910, 1.094)  |
| v_starchy_other  | 0.946(0.723,1.236)       | 1.028(0.833, 1.268)  |
| v_starchy_total  | 1.035(0.902,1.187)       | 1.002(0.927, 1.084)  |
| v_other          | 1.080(0.955,1.222)       | 0.960(0.885, 1.041)  |
| v_total          | 1.047(0.967,1.135)       | 0.983(0.937, 1.032)  |
| v_legumes        | 0.844(0.674,1.058)       | 0.932(0.777, 1.117)  |
| g_whole          | 0.984(0.931,1.040)       | 0.945(0.905, 0.988)  |
| g_refined        | 0.978(0.958,0.998)       | 0.959(0.946, 0.972)  |
| g_total          | 0.977(0.957,0.997)       | 0.955(0.942, 0.968)  |

|              |                    |                     |
|--------------|--------------------|---------------------|
| d_milk       | 0.799(0.737,0.867) | 0.820(0.765, 0.878) |
| d_yogurt     | 0.617(0.424,0.898) | 0.896(0.651, 1.233) |
| d_cheese     | 0.939(0.868,1.017) | 0.912(0.856, 0.970) |
| d_total      | 0.849(0.804,0.896) | 0.872(0.828, 0.918) |
| pf_meat      | 0.996(0.959,1.03)  | 0.989(0.969, 1.009) |
| pf_curedmeat | 0.956(0.901,1.015) | 0.966(0.937, 0.995) |
| pf_organ     | 1.050(0.889,1.240) | 0.969(0.850, 1.104) |
| pf_poult     | 1.071(1.038,1.106) | 1.047(1.032, 1.064) |
| pf_seafd_hi  | 1.175(1.066,1.295) | 1.061(1.012, 1.111) |
| pf_seafd_low | 0.963(0.919,1.010) | 1.015(0.992, 1.038) |
| pf_mps_total | 1.024(1.003,1.046) | 1.015(1.003, 1.027) |
| pf_eggs      | 0.876(0.797,0.964) | 0.891(0.837, 0.948) |
| pf_soy       | 1.004(0.786,1.284) | 0.951(0.828, 1.093) |
| pf_nutsds    | 0.996(0.939,1.057) | 0.967(0.936, 0.999) |
| pf_legumes   | 0.959(0.907,1.014) | 0.982(0.939, 1.028) |
| pf_total     | 1.012(0.993,1.032) | 1.001(0.989, 1.014) |
| add_sugars   | 0.996(0.990,1.002) | 0.997(0.994, 1.000) |
| oils         | 1.002(0.998,1.007) | 0.997(0.994, 1.000) |
| solid_fats   | 0.994(0.990,0.997) | 0.995(0.992, 0.997) |
| a_drinks     | 1.142(0.863,1.511) | 1.093(1.070, 1.117) |

Results were adjusted for age, gender, race, marriage, education, smoking, income, exercise, BMI, DM, pre-DM, hyperlipidemia, hypertension and CKD. DM, diabetes

mellitus, Pre-DM, prediabetes, CKD, Chronic Kidney Disease, HUA, hyperuricemia.

**Supplementary Table S9.** ORs and 95%CI for the association of variety of diets with HUA were excluded in populations with less than two years of follow-up

| Characteristics  | OR (95%CI)         |
|------------------|--------------------|
| f_whole          | 0.950(0.904,0.998) |
| f_citmlb         | 0.984(0.904,1.070) |
| f_juice          | 0.907(0.846,0.973) |
| f_other          | 0.927(0.875,0.981) |
| f_total          | 0.939(0.900,0.978) |
| v_drkgr          | 1.049(0.944,1.166) |
| v_redor_tomato   | 0.950(0.849,1.063) |
| v_redor_other    | 0.878(0.718,1.073) |
| v_redor_total    | 0.932(0.844,1.030) |
| v_starchy_potato | 1.000(0.924,1.082) |
| v_starchy_other  | 0.999(0.841,1.187) |
| v_starchy_total  | 1.000(0.934,1.070) |
| v_other          | 0.955(0.891,1.024) |
| v_total          | 0.980(0.943,1.018) |
| v_legumes        | 0.917(0.796,1.055) |
| g_whole          | 0.952(0.921,0.985) |
| g_refined        | 0.963(0.951,0.974) |
| g_total          | 0.959(0.948,0.971) |
| d_milk           | 0.837(0.798,0.879) |

---

|              |                    |
|--------------|--------------------|
| d_yogurt     | 0.752(0.565,1.001) |
| d_cheese     | 0.917(0.874,0.962) |
| d_total      | 0.875(0.842,0.909) |
| pf_meat      | 0.988(0.970,1.006) |
| pf_curedmeat | 0.951(0.925,0.978) |
| pf_organ     | 1.009(0.912,1.117) |
| pf_poult     | 1.054(1.040,1.068) |
| pf_seafd_hi  | 1.066(1.022,1.112) |
| pf_seafd_low | 1.008(0.987,1.030) |
| pf_mps_total | 1.015(1.005,1.026) |
| pf_eggs      | 0.884(0.838,0.932) |
| pf_soy       | 0.940(0.831,1.063) |
| pf_nutsds    | 0.974(0.948,1.000) |
| pf_legumes   | 0.979(0.946,1.013) |
| pf_total     | 1.003(0.992,1.014) |
| add_sugars   | 0.998(0.995,1.001) |
| oils         | 0.998(0.996,1.000) |
| solid_fats   | 0.994(0.992,0.996) |
| a_drinks     | 1.103(1.079,1.128) |

---

Results were adjusted for age, gender, race, marriage, education, smoking, drinking, income, exercise, BMI, DM, pre-DM, hyperlipidemia, hypertension and CKD. DM, diabetes mellitus, Pre-DM, prediabetes, CKD, Chronic Kidney Disease, HUA, hyperuricemia.
